# Supplementary material for: Resveratrol Improves Boar Sperm Quality via 5′AMP-Activated Protein Kinase Activation during Cryopreservation
Source: Hindawi journal article supplement (doi:10.1155/2019/5921503), 2019-09-04
Supplement: f1 [file 5921503.f1.pdf]

## Supplementary Figure

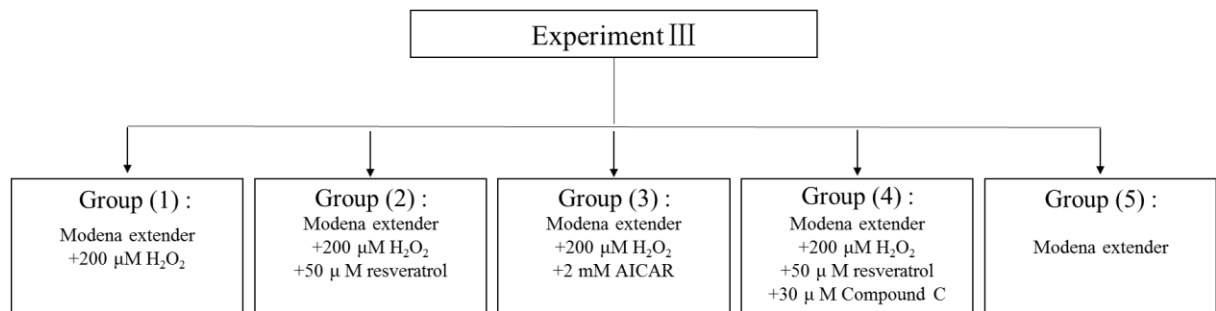

The scheme showed the five treatment groups in Experiment III

Supplementary Figure 1

Supplementary Figure 1: Group (1): Modena extender containing 200 μM H<sub>2</sub>O<sub>2</sub>; Group (2): Modena extender containing 200 μM H<sub>2</sub>O<sub>2</sub> and 50 μM resveratrol; Group (3): Modena extender containing 200 μM H<sub>2</sub>O<sub>2</sub> and 2 mM AICAR; Group (4): Modena extender containing 200 μM H<sub>2</sub>O<sub>2</sub>, 50 μM resveratrol and 30 μM Compound C; and Group (5): Modena extender without resveratrol, AICAR, Compound C or H<sub>2</sub>O<sub>2</sub>.
